# Supplementary material for: Triglyceride and Glucose Index Predicts Acute Coronary Syndrome in Patients with Antineutrophil Cytoplasmic Antibody-Associated Vasculitis
Source: MDPI journal article supplement (doi:10.3390/diagnostics12061486), 2022-06-17
Supplement: s1 [file s1]

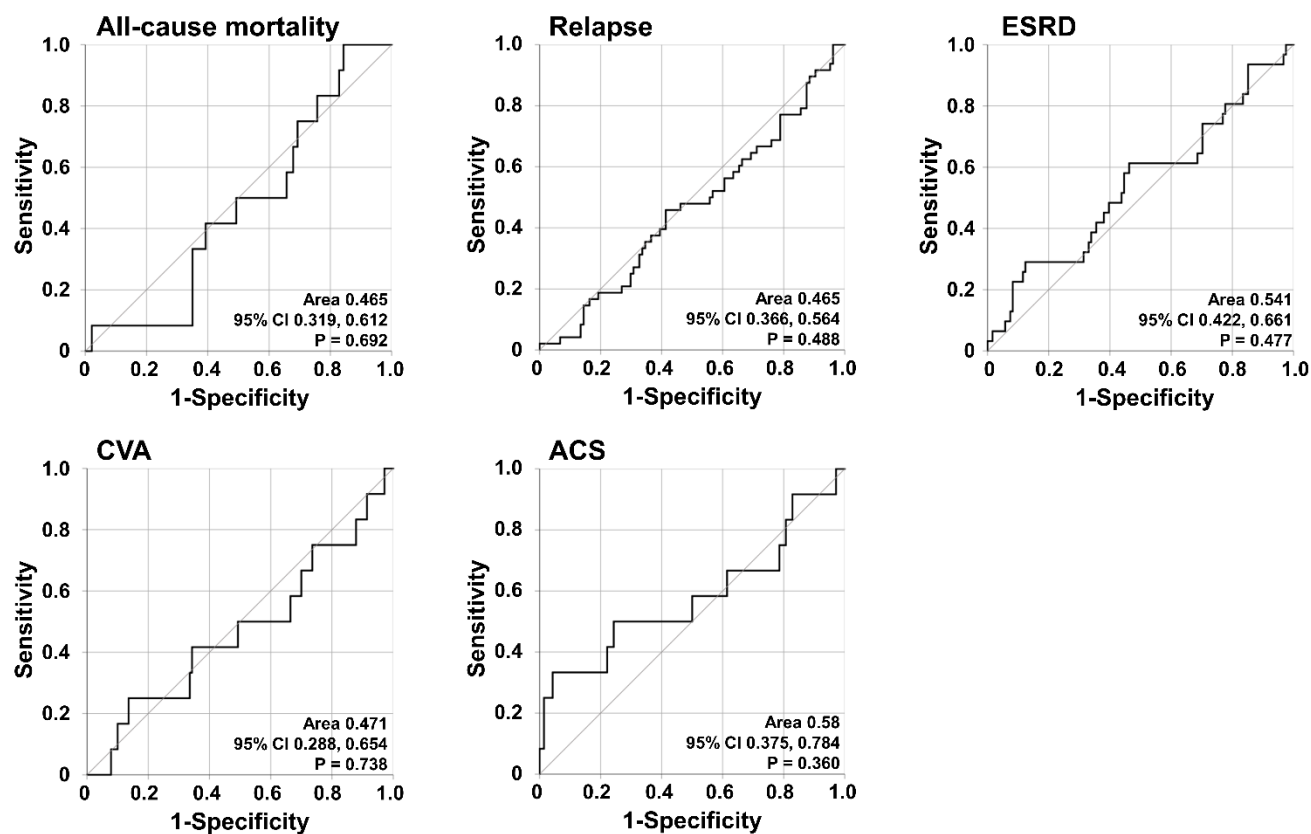

**Supplementary Figure S1.** The ROC curve analysis of TyG index for all-cause mortality, relapse, ESRD, CVA and ACS in patients with AAV. ROC, receiver operator characteristic; TyG, triglyceride-glucose; ESRD, end-stage renal disease; CVA, cerebrovascular accident; ACS, acute coronary syndrome; AAV, ANCA-associated vasculitis; ANCA, antineutrophil cytoplasmic antibody.

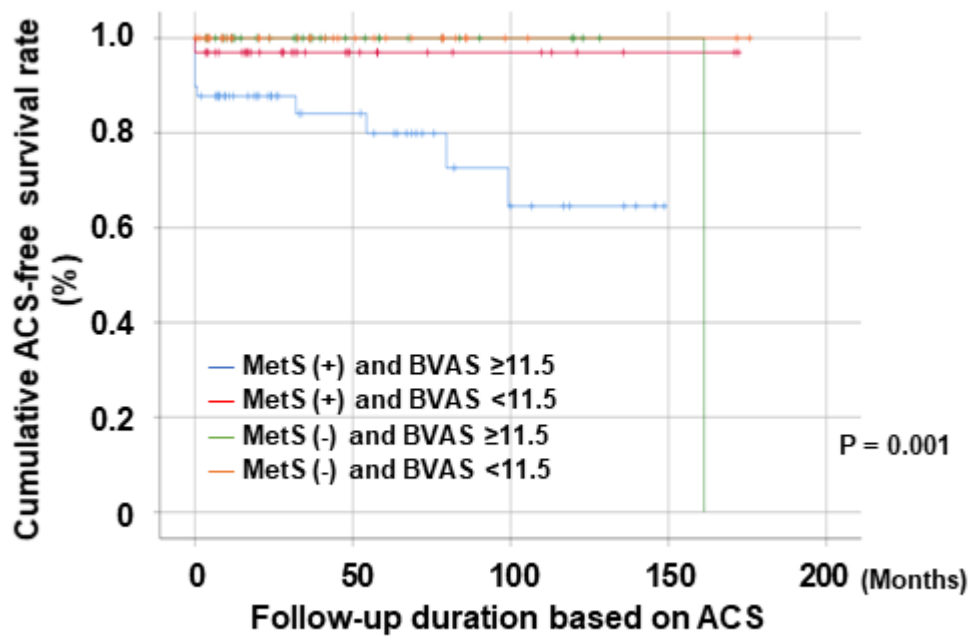

**Supplementary Figure S2.** Comparison of the cumulative ACS-free survival rates among the four groups according to the presence of MetS and BVAS  $\geq 11.5$ . ACS, acute coronary syndrome; MetS, metabolic syndrome; BVAS, Birmingham vasculitis activity score.

**Supplementary Table S1.** Correlation of the TyG index with continuous variables at AAV diagnosis

| Variables                                  | Values                      |         |
|--------------------------------------------|-----------------------------|---------|
|                                            | Correlation coef<br>ficient | P-value |
| Age (years)                                | 0.118                       | 0.146   |
| BMI (kg/m <sup>2</sup> )                   | 0.222                       | 0.006   |
| BVAS                                       | 0.019                       | 0.819   |
| FFS                                        | 0.063                       | 0.447   |
| White blood cell count (/mm <sup>3</sup> ) | 0.076                       | 0.354   |
| Haemoglobin (g/dL)                         | -0.006                      | 0.941   |
| Platelet count (× 1000/mm <sup>3</sup> )   | 0.083                       | 0.314   |
| Blood urea nitrogen (mg/dL)                | 0.026                       | 0.750   |
| Serum creatinine (mg/dL)                   | 0.077                       | 0.347   |
| Serum albumin (g/dL)                       | -0.063                      | 0.448   |
| Total cholesterol (mg/dL)                  | 0.002                       | 0.976   |
| HDL-cholesterol (mg/dL)                    | -0.182                      | 0.029   |
| LDL-cholesterol (mg/dL)                    | -0.236                      | 0.005   |
| ESR (mm/hr)                                | 0.134                       | 0.104   |
| CRP (mg/L)                                 | 0.081                       | 0.325   |

TyG, triglyceride glucose; AAV, ANCA-associated vasculitis; ANCA, antineutrophil cytoplasmic antibody; BMI, body mass index; BVAS, Birmingham vasculitis activity score; FFS, five factor score; HDL, high density lipoprotein; LDL, low density lipoprotein; ESR, erythrocyte sedimentation rate; CRP, C-reactive protein.

**Supplementary Table S2.** Logistic regression analysis of variables for metabolic syndrome in AAV patients at the time of diagnosis\*

| Variables                     | Univariable |               |         | Multivariable<br>(Variables with P < 0.10) |               |         |
|-------------------------------|-------------|---------------|---------|--------------------------------------------|---------------|---------|
|                               | OR          | 95% CI        | P value | OR                                         | 95% CI        | P value |
| Age                           | 1.038       | 1.014, 1.064  | 0.002   | 1.026                                      | 0.989, 1.064  | 0.168   |
| Male sex                      | 1.131       | 0.573, 2.234  | 0.722   |                                            |               |         |
| BMI                           | 1.268       | 1.123, 1.432  | <0.001  | 1.327                                      | 1.131, 1.556  | 0.001   |
| MPA                           | 0.967       | 0.509, 1.836  | 0.918   |                                            |               |         |
| GPA                           | 1.018       | 0.477, 2.172  | 0.963   |                                            |               |         |
| EGPA                          | 1.031       | 0.475, 2.237  | 0.938   |                                            |               |         |
| MPO-ANCA (or P-ANCA) positive | 2.636       | 1.313, 5.291  | 0.006   | 1.592                                      | 0.603, 4.204  | 0.348   |
| PR3-ANCA (or C-ANCA) positive | 0.671       | 0.271, 1.664  | 0.389   |                                            |               |         |
| BVAS                          | 1.060       | 1.010, 1.113  | 0.019   | 1.046                                      | 0.970, 1.127  | 0.240   |
| FFS                           | 1.363       | 0.997, 1.864  | 0.053   | 0.778                                      | 0.454, 1.333  | 0.360   |
| White blood cell count        | 1.000       | 1.000, 1.000  | 0.050   | 1.000                                      | 1.000, 1.000  | 0.396   |
| Haemoglobin                   | 0.822       | 0.711, 0.950  | 0.008   | 0.723                                      | 0.538, 0.971  | 0.031   |
| Platelet count                | 1.003       | 1.001, 1.006  | 0.013   | 1.003                                      | 0.999, 1.006  | 0.145   |
| Blood urea nitrogen           | 1.011       | 0.996, 1.026  | 0.140   |                                            |               |         |
| Serum creatinine              | 1.093       | 0.928, 1.287  | 0.287   |                                            |               |         |
| Serum albumin (g/dL)          | 0.529       | 0.326, 0.857  | 0.010   | 1.710                                      | 0.616, 4.747  | 0.303   |
| Total cholesterol (mg/dL)     | 0.998       | 0.991, 1.005  | 0.531   |                                            |               |         |
| ESR (mm/hr)                   | 1.014       | 1.004, 1.023  | 0.004   | 0.997                                      | 0.982, 1.012  | 0.700   |
| CRP (mg/L)                    | 1.010       | 1.003, 1.018  | 0.004   | 1.005                                      | 0.994, 1.015  | 0.396   |
| <b>TyG</b>                    | 6.572       | 2.943, 14.677 | <0.001  | 5.667                                      | 2.071, 15.506 | 0.001   |

\*Since T2DM, hypertension, HDL-cholesterol, and LDL-cholesterol are included in the 5 components for the diagnosis of MetS, they were not included in the logistic regression analysis of variables for metabolic syndrome in AAV patients at diagnosis.

AAV, ANCA-associated vasculitis; ANCA, antineutrophil cytoplasmic antibody; BMI, body mass index; MPA, microscopic polyangiitis; GPA, granulomatosis with polyangiitis; EGPA, eosinophilic granulomatosis with polyangiitis; MPO, myeloperoxidase; P, perinuclear; PR3, proteinase 3; C, cytoplasmic; BVAS, Birmingham vasculitis activity score; FFS, five-factor score; ESR, erythrocyte sedimentation rate; CRP, C-reactive protein; TyG, triglyceride and glucose index.

**Supplementary Table S3.** Cox hazards model analysis of variables at AAV diagnosis for ACS during follow-up including BVAS  $\geq 11.5$ 

| Variables                     | Univariable |               |         | Multivariable |               |         |
|-------------------------------|-------------|---------------|---------|---------------|---------------|---------|
|                               | HR          | 95% CI        | P value | HR            | 95% CI        | P value |
| Age                           | 1.024       | 0.978, 1.071  | 0.309   |               |               |         |
| Male sex                      | 4.933       | 1.403, 17.345 | 0.013   | 5.034         | 1.229, 20.619 | 0.025   |
| BMI                           | 1.131       | 0.940, 1.359  | 0.192   |               |               |         |
| MPA                           | 1.595       | 0.475, 5.354  | 0.450   |               |               |         |
| GPA                           | 0.730       | 0.159, 3.340  | 0.685   |               |               |         |
| EGPA                          | 0.674       | 0.144, 3.151  | 0.616   |               |               |         |
| MPO-ANCA (or P-ANCA) positive | 2.930       | 0.622, 13.804 | 0.174   |               |               |         |
| PR3-ANCA (or C-ANCA) positive | 1.954       | 0.249, 15.314 | 0.524   |               |               |         |
| BVAS $\geq 11.5$              | 11.112      | 1.376, 89.721 | 0.024   | 9.113         | 0.940, 88.349 | 0.057   |
| FFS                           | 1.936       | 1.147, 3.265  | 0.013   | 1.391         | 0.785, 2.468  | 0.258   |
| T2DM                          | 4.255       | 1.245, 14.537 | 0.021   | 1.707         | 0.464, 6.275  | 0.421   |
| Hypertension                  | 3.086       | 0.971, 9.805  | 0.056   | 2.789         | 0.809, 9.612  | 0.104   |
| White blood cell count        | 1.000       | 1.000, 1.000  | 0.320   |               |               |         |
| Haemoglobin                   | 0.807       | 0.615, 1.059  | 0.123   |               |               |         |
| Platelet count                | 1.000       | 0.997, 1.004  | 0.842   |               |               |         |
| Blood urea nitrogen           | 1.013       | 1.000, 1.027  | 0.054   | 1.005         | 0.989, 1.021  | 0.563   |
| Serum creatinine              | 1.142       | 0.911, 1.432  | 0.249   |               |               |         |
| Serum albumin                 | 0.600       | 0.273, 1.320  | 0.204   |               |               |         |
| Total cholesterol             | 1.005       | 0.992, 1.017  | 0.456   |               |               |         |
| HDL-cholesterol (mg/dL)       | 0.986       | 0.954, 1.019  | 0.401   |               |               |         |
| LDL-cholesterol (mg/dL)       | 1.007       | 0.993, 1.020  | 0.318   |               |               |         |
| ESR                           | 1.007       | 0.992, 1.022  | 0.350   |               |               |         |
| CRP                           | 1.005       | 0.997, 1.013  | 0.249   |               |               |         |
| TyG $\geq 9.011$              | 3.054       | 0.959, 9.726  | 0.059   | 2.642         | 0.631, 11.064 | 0.184   |

AAV, ANCA-associated vasculitis; ANCA, antineutrophil cytoplasmic antibody; BMI, body mass index; MPA, microscopic polyangiitis; GPA, granulomatosis with polyangiitis; EGPA, eosinophilic granulomatosis with polyangiitis; MPO, myeloperoxidase; P, perinuclear; PR3, proteinase 3; C, cytoplasmic; BVAS, Birmingham vasculitis activity score; FFS, five-factor score; HDL, high density lipoprotein; LDL, low density lipoprotein; ESR, erythrocyte sedimentation rate; CRP, C-reactive protein; TyG, triglyceride and glucose.
